# Supplementary material for: Genome-wide RNA-seq of iPSC-derived motor neurons indicates selective cytoskeletal perturbation in Brown–Vialetto disease that is partially rescued by riboflavin
Source: PubMed Central journal article supplement (PMC5382781; doi:10.1038/srep46271), 2017-04-06
Supplement: srep46271-s1.pdf [file srep46271-s1.pdf]

**Genome-wide RNA-seq of iPSC-derived motor neurons indicates selective cytoskeletal perturbation in Brown–Vialletto disease that is partially rescued by riboflavin**

Federica Rizzo<sup>1\*</sup>, Agnese Ramirez<sup>1\*</sup>, Claudia Compagnucci<sup>2\*</sup>, Sabrina Salani<sup>1</sup>, Valentina Melzi<sup>1</sup>, Andreina Bordoni<sup>1</sup>, Francesco Fortunato<sup>1</sup>, Alessia Niceforo<sup>2</sup>, Nereo Bresolin<sup>1</sup>, Giacomo P. Comi<sup>1</sup>, Enrico Bertini<sup>2</sup>, Monica Nizzardo<sup>1</sup> and Stefania Corti<sup>1\*\*</sup>

<sup>1</sup>Dino Ferrari Centre, Neuroscience Section, Department of Pathophysiology and Transplantation (DEPT), University of Milan, Neurology Unit, IRCCS Foundation Ca' Granda Ospedale Maggiore Policlinico, Milan, Italy.

<sup>2</sup>Unit of Neuromuscular and Neurodegenerative Disorders, Laboratory of Molecular Medicine, Bambino Gesù' Children's Research Hospital, Rome, Italy

\*Equally contributed to the work

\*\*Corresponding author: Neuroscience Section, Department of Pathophysiology and Transplantation (DEPT), University of Milan, Neurology Unit, IRCCS Foundation Ca' Granda Ospedale Maggiore Policlinico, Via Francesco Sforza 35, 20122 Milan Italy. Tel: +39 0255033833; Fax: +39 0255033800; Email: stefania.corti@unimi.it.

### Supplementary Figure 1. Reprogramming human BVVL fibroblasts into iPSCs.

Immunocytochemical characterization of WT and BVVL-iPSCs (RFVT2 iPSC and RFVT3 iPSC). These iPSCs showed the typical pluripotent stem cell colonies morphology at the contrast phase microscope (left panels). The cells also expressed pluripotency transcription factors, including NANOG (red), and stem cell surface markers SSEA-3 (green). Nuclei were labeled with DAPI (blue). Scale bars: 100  $\mu$ m.

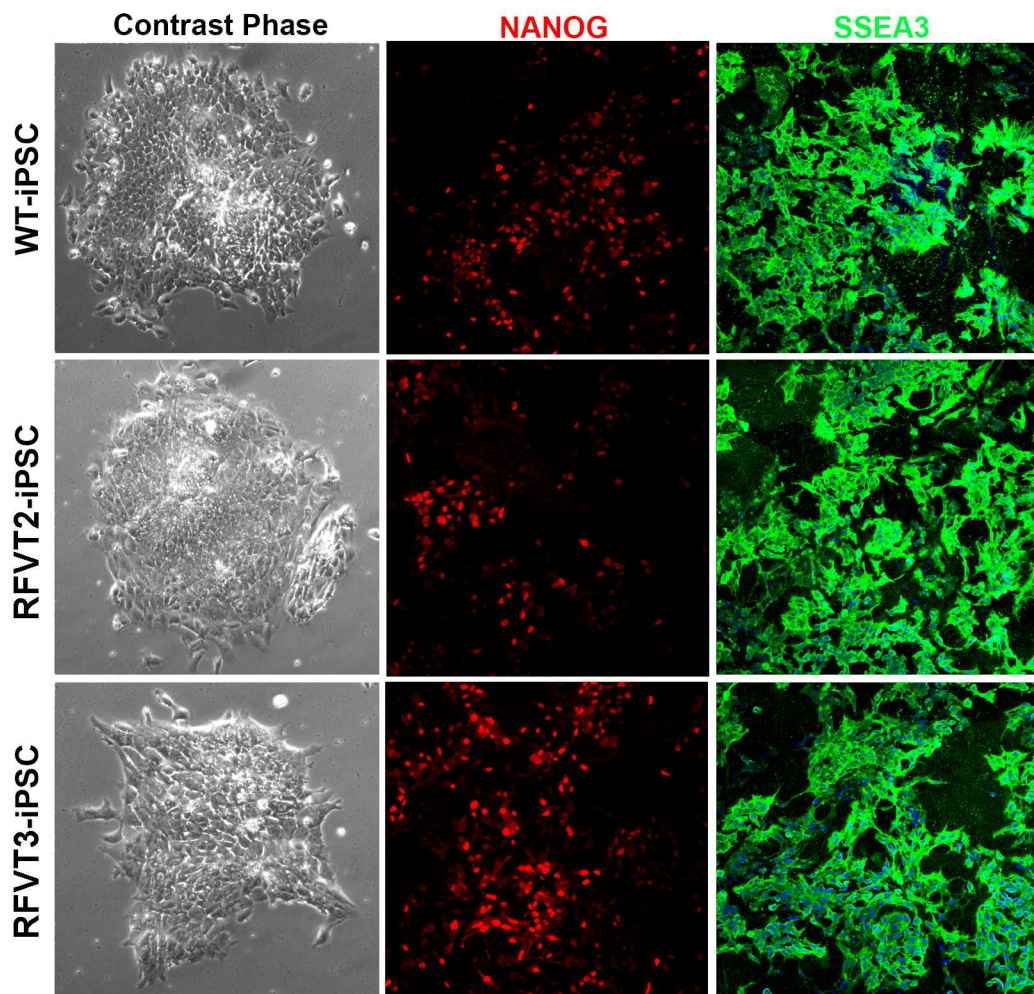

**Supplementary Figure 2. Transcriptional analysis of BVVL-MNs treated with riboflavin (BVVL-MNs+B2) vs WT-MNs by RNA-Seq analysis** *Left:* Graphical representation of the transcriptomic analysis of differentially expressed genes in BVVL-MNs+B2 vs WT-MNs. *Right:* 564 genes were up-regulated and 468 were down-regulated in BVVL-MNs+B2 (fold change  $\geq 2$  and diverge probability  $\geq 0.8$ ).

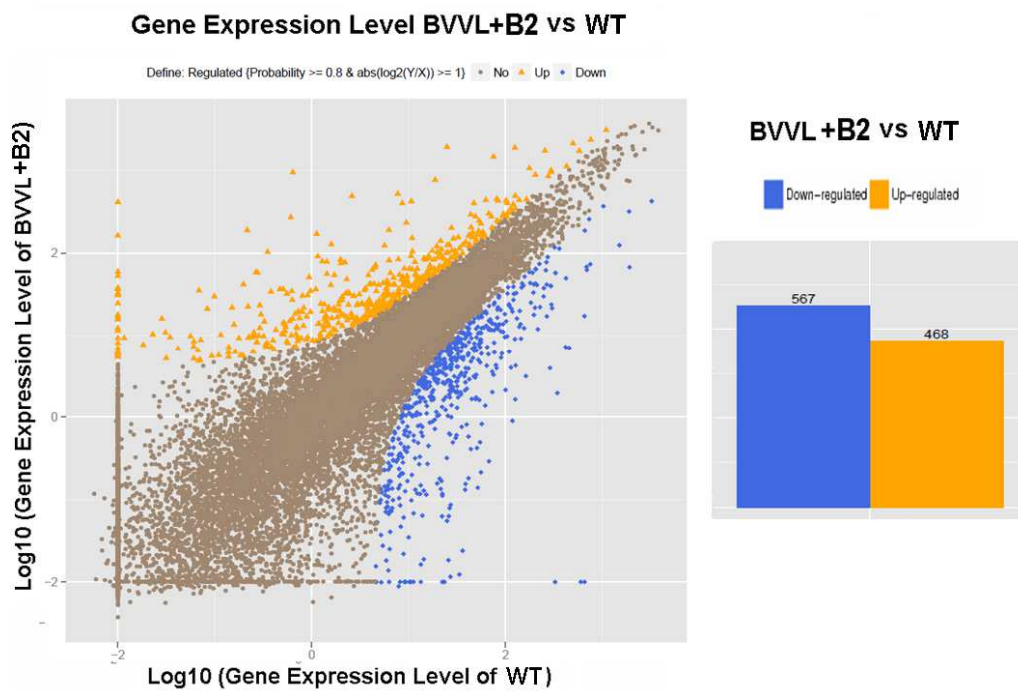

**Supplementary Table 1.** Characteristics of human fibroblast-derived induced pluripotent stem cells (iPSCs).

| <b>iPSC line</b> | <b>Diagnosis</b> | <b>Clinical phenotype</b> | <b>Mutation</b>     | <b>Sex</b> | <b>Age (years)</b> | <b>Ref.</b> |
|------------------|------------------|---------------------------|---------------------|------------|--------------------|-------------|
| RFVT2 1.1        | BVVL             | Ciccolella 2012           | c.796C>T/c.955C>T   | Male       | 13                 | This report |
| RFVT2 1.2        | BVVL             | Ciccolella 2012           | c.796C>T/c.955C>T   | Male       | 13                 | This report |
| RFVT2 1.3        | BVVL             | Ciccolella 2012           | c.796C>T/c.955C>T   | Male       | 13                 | This report |
| RFVT3 2.1        | BVVL             | Ciccolella 2013           | c.155C>T/c.1255G>A  | Male       | 3                  | This report |
| RFVT3 2.2        | BVVL             | Ciccolella 2013           | c.155C>T /c.1255G>A | Male       | 3                  | This report |
| RFVT3 2.3        | BVVL             | Ciccolella 2013           | c.155C>T /c.1255G>A | Male       | 3                  | This report |
| 19.9             | Healthy Donor    | -                         | -                   | Male       | Newborn            | Simone2014  |
| CTRAC 1.1        | Healthy Donor    | -                         | -                   | Female     | 24                 | Simone 2014 |
| CTRAC 1.2        | Healthy Donor    | -                         | -                   | Female     | 24                 | Simone 2014 |
| CTRAC 1.3        | Healthy Donor    | -                         | -                   | Female     | 24                 | Simone 2014 |

**Supplementary Table 2. List of genes with significantly altered expression in BVVL MNs compared to WT MNs in RNA sequencing (fold-change  $\geq 2$  and diverge probability  $\geq 0.8$ )**

| <b>GeneID</b> | <b>Gene Symbol</b> | <b>log2Ratio(BVVL/WT)</b> |
|---------------|--------------------|---------------------------|
| 3956          | LGALS1             | -5,511881516              |
| 1277          | COL1A1             | -5,718496555              |
| 811           | CALR               | -2,086576275              |
| 5763          | PTMS               | -2,835204356              |
| 6678          | SPARC              | -3,329410144              |
| 4267          | CD99               | -2,856306453              |
| 7045          | TGFBI              | -3,753779641              |
| 2335          | FN1                | -2,29879703               |
| 4323          | MMP14              | -4,098741442              |
| 1278          | COL1A2             | -3,59266086               |
| 100505503     | -                  | -15,99683934              |
| 100008589     | RNA28S5            | 2,079455756               |
| 3488          | IGFBP5             | -4,230882934              |
| 378938        | MALAT1             | -5,389575998              |
| 1291          | COL6A1             | -3,167264268              |
| 6876          | TAGLN              | -2,476970174              |
| 51504         | TRMT112            | -2,065706512              |
| 3490          | IGFBP7             | -3,970877493              |
| 728658        | RPL13AP5           | -9,65577666               |
| 6206          | RPS12              | 2,477648413               |
| 100861532     | RNA45S5            | -4,575717917              |
| 10631         | POSTN              | -2,350101669              |
| 1289          | COL5A1             | -3,6483772                |
| 4922          | NTS                | -5,174965825              |
| 4313          | MMP2               | -2,997023984              |
| 1292          | COL6A2             | -2,364963115              |
| 6281          | S100A10            | -2,527104303              |
| 6160          | RPL31              | 2,891765256               |
| 1290          | COL5A2             | -2,123785961              |

|           |             |              |
|-----------|-------------|--------------|
| 6277      | S100A6      | -2,101616389 |
| 378706    | RN7SL2      | -2,49109058  |
| 8870      | IER3        | -2,494488882 |
| 6229      | RPS24       | 2,974916745  |
| 11117     | EMILIN1     | -4,708607892 |
| 633       | BGN         | -5,090555267 |
| 6227      | RPS21       | 2,472473061  |
| 7070      | THY1        | -2,985053366 |
| 1282      | COL4A1      | -3,355047938 |
| 1284      | COL4A2      | -2,667606172 |
| 6029      | RN7SL1      | -2,518951449 |
| 5460      | POU5F1      | 2,065893094  |
| 125144    | LRRC75A-AS1 | 2,090382734  |
| 3371      | TNC         | -4,128284155 |
| 5270      | SERPINE2    | -2,267969849 |
| 9902      | MRC2        | -2,806279193 |
| 7837      | PXDN        | -2,040156545 |
| 165       | AEBP1       | -2,59004056  |
| 1295      | COL8A1      | -7,686618279 |
| 664709    | HNRNPA1P10  | -6,742124342 |
| 1026      | CDKN1A      | -3,125632591 |
| 6382      | SDC1        | -3,46655732  |
| 6235      | RPS29       | 3,680902915  |
| 5919      | RARRES2     | -3,541095047 |
| 6696      | SPP1        | -3,925652455 |
| 4666      | NACA        | 2,991944147  |
| 284119    | PTRF        | -3,55690797  |
| 301       | ANXA1       | -2,076744601 |
| 100131205 | RPL21P28    | -4,23986448  |
| 6238      | RRBP1       | -2,355207985 |
| 4017      | LOXL2       | -2,266905636 |
| 6158      | RPL28       | 2,120583275  |
| 6173      | RPL36A      | 2,582144171  |

|           |             |              |
|-----------|-------------|--------------|
| 7040      | TGFB1       | -3,409542796 |
| 654364    | NME1-NME2   | -2,319593083 |
| 152007    | GLIPR2      | -2,495482564 |
| 822       | CAPG        | -2,744291944 |
| 2173      | FABP7       | -2,527099408 |
| 151887    | CCDC80      | -4,110094532 |
| 27122     | DKK3        | -2,858717569 |
| 10683     | DLL3        | -2,088703019 |
| 5355      | PLP2        | -2,589692127 |
| 64855     | FAM129B     | -2,192368691 |
| 514       | ATP5E       | 2,546034972  |
| 2621      | GAS6        | -2,842197609 |
| 23022     | PALLD       | -2,422849513 |
| 3693      | ITGB5       | -2,575681424 |
| 7057      | THBS1       | -2,429501658 |
| 618       | BCYRN1      | -3,463291228 |
| 1293      | COL6A3      | -2,702842781 |
| 100533955 | SEN3-EIF4A1 | -6,728040401 |
| 143282    | FGFBP3      | -2,263941223 |
| 140576    | S100A16     | -2,817462629 |
| 1381      | CRABP1      | 4,871077624  |
| 4747      | NEFL        | -2,190687053 |
| 2012      | EMP1        | -2,64532538  |
| 187       | APLNR       | -2,369856522 |
| 10867     | TSPAN9      | -2,402742209 |
| 8364      | HIST1H4C    | -6,257694326 |
| 3219      | HOXB9       | -2,181123444 |
| 7474      | WNT5A       | -3,087666315 |
| 794       | CALB2       | -5,444495788 |
| 23091     | ZC3H13      | -2,219897517 |
| 56937     | PMEPA1      | -5,030211468 |
| 7857      | SCG2        | -7,162565259 |
| 11031     | RAB31       | -2,388293281 |

|           |                |              |
|-----------|----------------|--------------|
| 27063     | ANKRD1         | -3,285910319 |
| 4885      | NPTX2          | -3,216763978 |
| 894       | CCND2          | -2,137449952 |
| 144983    | HNRNPA1L2      | -2,907569712 |
| 112597    | LINC00152      | -2,667731202 |
| 100529067 | SERF2-C15ORF63 | -6,540850999 |
| 6004      | RGS16          | -2,794200795 |
| 60492     | CCDC90B        | -2,147209829 |
| 50863     | NTM            | -3,270620994 |
| 26585     | GREM1          | -2,797120739 |
| 8459      | TPST2          | -2,195021231 |
| 6285      | S100B          | -3,189880355 |
| 30844     | EHD4           | -2,846707699 |
| 9547      | CXCL14         | -3,096502606 |
| 57333     | RCN3           | -3,394395781 |
| 90993     | CREB3L1        | -3,0650721   |
| 1969      | EPHA2          | -2,705517176 |
| 441502    | RPS26P11       | -9,516174535 |
| 4300      | MLLT3          | -2,375942519 |
| 1958      | EGR1           | 2,925239546  |
| 5054      | SERPINE1       | -3,757067154 |
| 2791      | GNG11          | -2,511800979 |
| 100526842 | RPL17-C18orf32 | -2,512211695 |
| 8728      | ADAM19         | -3,742089925 |
| 79081     | LBHD1          | -3,697412839 |
| 26010     | SPATS2L        | -2,379852753 |
| 100529239 | RPS10-NUDT3    | -5,023028003 |
| 84870     | RSPO3          | -3,295400737 |
| 7044      | LEFTY2         | -3,757367289 |
| 4239      | MFAP4          | -3,086146655 |
| 857       | CAV1           | -2,320409163 |
| 9452      | ITM2A          | -3,274314784 |
| 388       | RHOB           | 2,477603648  |



|           |               |              |
|-----------|---------------|--------------|
| 4071      | TM4SF1        | -7,061466674 |
| 9350      | CER1          | -5,145113378 |
| 8822      | FGF17         | -4,009718623 |
| 56034     | PDGFC         | -2,936123833 |
| 7041      | TGFB111       | -2,365801814 |
| 5654      | HTRA1         | -2,480776896 |
| 4907      | NT5E          | -7,248902671 |
| 2353      | FOS           | 3,449433677  |
| 100532726 | NDUFC2-KCTD14 | -3,551913779 |
| 4837      | NNMT          | -5,427243076 |
| 55214     | P3H2          | -2,68997014  |
| 84171     | LOXL4         | -5,586387631 |
| 23612     | PHLDA3        | -3,149983195 |
| 6892      | TAPBP         | -2,352705691 |
| 26509     | MYOF          | -2,946097005 |
| 4710      | NDUFB4        | 2,114742198  |
| 728689    | EIF3CL        | -11,70644237 |
| 79366     | HMGNS5        | -3,717848181 |
| 6862      | T             | -2,621214414 |
| 5328      | PLAU          | -2,593353079 |
| 2170      | FABP3         | -3,181885817 |
| 9697      | TRAM2         | -2,476661922 |
| 2571      | GAD1          | -4,351704315 |
| 115908    | CTHRC1        | -2,712981852 |
| 25960     | ADGRA2        | -2,519009137 |
| 5396      | PRRX1         | -2,75273623  |
| 4015      | LOX           | -2,962410059 |
| 5936      | RBM4          | 2,084943535  |
| 1300      | COL10A1       | -6,603619621 |
| 22801     | ITGA11        | -6,173713506 |
| 3233      | HOXD4         | -3,655436331 |
| 3235      | HOXD9         | -4,401778883 |
| 10842     | PPP1R17       | -2,686020327 |

|           |                 |              |
|-----------|-----------------|--------------|
| 541471    | MIR4435-2HG     | -2,837314305 |
| 133       | ADM             | -2,531802331 |
| 7763      | ZFAND5          | 2,251589645  |
| 729739    | LOC729739       | -5,618787093 |
| 3037      | HAS2            | -2,653734697 |
| 23671     | TMEFF2          | -3,499693686 |
| 8829      | NRP1            | -2,894745275 |
| 7478      | WNT8A           | -2,531629917 |
| 26353     | HSPB8           | -4,467214466 |
| 26002     | MOXD1           | -4,276286102 |
| 100532735 | INO80B-WBP1     | -2,455256019 |
| 25907     | TMEM158         | -2,508368741 |
| 4053      | LTBP2           | -4,585706113 |
| 2162      | F13A1           | -5,886517454 |
| 100532737 | ATP6V1G2-DDX39B | -2,419599013 |
| 100526836 | BLOC1S5-TXNDC5  | -3,687059565 |
| 3675      | ITGA3           | -3,525198273 |
| 92196     | DAPL1           | -6,074442301 |
| 1893      | ECM1            | -4,558950519 |
| 390       | RND3            | 2,412638704  |
| 2         | A2M             | -4,723374035 |
| 55568     | GALNT10         | -2,364523547 |
| 1305      | COL13A1         | -3,117231941 |
| 3231      | HOXD1           | -3,685145712 |
| 149111    | CNIH3           | -3,39552372  |
| 207107    | SFTA1P          | -9,436665115 |
| 100528064 | NEDD8-MDP1      | -7,224974258 |
| 91624     | NEXN            | -4,277298563 |
| 3671      | ISLR            | -3,562588287 |
| 342979    | PALM3           | -2,691516764 |
| 8320      | EOMES           | -6,062542384 |
| 6793      | STK10           | -2,761027303 |
| 56849     | TCEAL7          | -3,356897235 |

|           |                 |              |
|-----------|-----------------|--------------|
| 100529209 | RNASEK-C17orf49 | -4,227345302 |
| 136319    | MTPN            | -3,916351994 |
| 112464    | PRKCDBP         | -2,984293877 |
| 653464    | SRGAP2C         | -2,578571932 |
| 29995     | LMCD1           | -2,666961791 |
| 1674      | DES             | -3,361762438 |
| 518       | ATP5G3          | 2,024912991  |
| 5480      | PPIC            | -2,596829915 |
| 6911      | TBX6            | -2,544609734 |
| 3624      | INHBA           | -6,51542372  |
| 9235      | IL32            | -3,016760465 |
| 100534592 | URGCP-MRPS24    | -4,731569755 |
| 3398      | ID2             | 2,780588848  |
| 9961      | MVP             | -2,61769399  |
| 11010     | GLIPR1          | -2,903370138 |
| 27344     | PCSK1N          | -2,75134331  |
| 64399     | HHIP            | -6,125196055 |
| 83468     | GLT8D2          | -3,053103851 |
| 81855     | SFXN3           | -3,566965611 |
| 126868    | MAB21L3         | -4,431865662 |
| 5455      | POU3F3          | -2,976497205 |
| 728855    | LINC00623       | -3,203630587 |
| 3226      | HOXC10          | -3,816491941 |
| 100996939 | PYURF           | -11,03068335 |
| 126328    | NDUFA11         | 2,914124927  |
| 92689     | FAM114A1        | -2,755237258 |
| 219699    | UNC5B           | -2,884056503 |
| 55816     | DOK5            | 2,222188101  |
| 100302739 | PCNA-AS1        | 2,908668699  |
| 771       | CA12            | -3,383429365 |
| 3215      | HOXB5           | -3,72599215  |
| 9955      | HS3ST3A1        | -3,492316764 |
| 3237      | HOXD11          | -5,624181843 |

|           |              |              |
|-----------|--------------|--------------|
| 6423      | SFRP2        | 2,775128732  |
| 79901     | CYBRD1       | -2,785234419 |
| 4826      | NNAT         | 2,449872467  |
| 3214      | HOXB4        | -3,049413673 |
| 3236      | HOXD10       | -6,088410102 |
| 27286     | SRPX2        | -5,047819872 |
| 51313     | FAM198B      | -3,746632219 |
| 115701    | ALPK2        | -2,84274678  |
| 10516     | FBLN5        | -3,587100727 |
| 6495      | SIX1         | -3,959980379 |
| 1464      | CSPG4        | -3,856534385 |
| 93010     | B3GNT7       | -2,94594074  |
| 100526833 | SEPT5-GP1BB  | -2,915141507 |
| 83881     | MIXL1        | -2,820126833 |
| 2303      | FOXC2        | -4,028080168 |
| 10882     | C1QL1        | -2,995713963 |
| 304       | ANXA2P2      | -7,324658159 |
| 290       | ANPEP        | -3,011388339 |
| 171423    | PDIA3P1      | -3,259175223 |
| 3217      | HOXB7        | -3,185311874 |
| 1652      | DDT          | 2,612930049  |
| 10417     | SPON2        | -4,128374301 |
| 3206      | HOXA10       | -2,967843217 |
| 9060      | PAPSS2       | -3,874900277 |
| 23209     | MLC1         | -4,830635452 |
| 10739     | RFPL2        | -5,367649596 |
| 3232      | HOXD3        | -3,87743896  |
| 9518      | GDF15        | -3,499479523 |
| 57381     | RHOJ         | -3,458722754 |
| 387758    | FIBIN        | -3,340766066 |
| 100534589 | HOXA10-HOXA9 | -5,943783911 |
| 26851     | SNORD3B-1    | -4,424966917 |
| 653659    | TMEM183B     | -3,705691872 |

|           |                |              |
|-----------|----------------|--------------|
| 7262      | PHLDA2         | -3,11823439  |
| 100528018 | ARL2-SNX15     | -10,32953343 |
| 2297      | FOXD1          | -3,063688006 |
| 84973     | SNHG7          | 2,238780636  |
| 339122    | RAB43          | -3,070162594 |
| 8038      | ADAM12         | -3,503366856 |
| 1843      | DUSP1          | 2,872306977  |
| 100885850 | PTGES3L-AARSD1 | -3,725721666 |
| 7058      | THBS2          | -3,639955283 |
| 199990    | FAAP20         | 2,240165686  |
| 1307      | COL16A1        | -3,223354706 |
| 64123     | ADGRL4         | -5,643006131 |
| 441531    | PGAM4          | -7,502725094 |
| 283208    | P4HA3          | -7,330115936 |
| 780852    | SNORD3B-2      | -4,175388244 |
| 83690     | CRISPLD1       | 2,250116379  |
| 8862      | APLN           | -4,888737373 |
| 2670      | GFAP           | -6,812863492 |
| 10874     | NMU            | 3,325188819  |
| 727849    | -              | -10,03740814 |
| 4312      | MMP1           | -3,652080549 |
| 574036    | SERTAD4-AS1    | -4,442755983 |
| 441454    | LOC441454      | -5,433417168 |
| 131034    | CPNE4          | -4,150656075 |
| 3234      | HOXD8          | -3,744925783 |
| 8436      | SDPR           | -7,380871471 |
| 388135    | C15orf59       | -3,81490878  |
| 5696      | PSMB8          | -3,614435194 |
| 10637     | LEFTY1         | -4,604099689 |
| 642423    | LOC642423      | -5,22162182  |
| 8291      | DYSF           | -4,009038478 |
| 26289     | AK5            | -4,456835738 |
| 6447      | SCG5           | 2,3842339    |

|           |               |              |
|-----------|---------------|--------------|
| 51393     | TRPV2         | -3,880365442 |
| 5069      | PAPPA         | -3,69492269  |
| 57214     | CEMIP         | -5,758704143 |
| 677767    | SCARNA7       | -9,757160691 |
| 10457     | GPNMB         | 3,330504357  |
| 360132    | FKBP9P1       | -5,586900291 |
| 283106    | CSNK2A3       | -6,890530661 |
| 3589      | IL11          | -3,962829346 |
| 169044    | COL22A1       | -4,731614961 |
| 780853    | SNORD3C       | -9,678883364 |
| 728875    | -             | -9,673398063 |
| 9358      | ITGBL1        | -5,813893267 |
| 10653     | SPINT2        | 2,266581616  |
| 4212      | MEIS2         | 2,739549508  |
| 8788      | DLK1          | 3,437757865  |
| 100874392 | ANKRD20A12P   | -5,062385144 |
| 283070    | -             | -9,642742956 |
| 389692    | MAFA          | -6,407421981 |
| 23261     | CAMTA1        | 2,672955021  |
| 140766    | ADAMTS14      | -4,872994137 |
| 3887      | KRT81         | -6,386878974 |
| 552891    | DNAJC25-GNG10 | -6,707025199 |
| 55747     | -             | -9,399554375 |
| 3207      | HOXA11        | -4,546697163 |
| 84219     | WDR24         | -9,368695416 |
| 4322      | MMP13         | -6,371463567 |
| 6356      | CCL11         | -7,739447215 |
| 100463285 | MTRNR2L4      | -6,512645249 |
| 642778    | NPIPA3        | -5,411728297 |
| 4610      | MYCL          | 3,225322468  |
| 467       | ATF3          | 2,595210045  |
| 100529241 | HSPE1-MOB4    | -4,87121033  |
| 3481      | IGF2          | 2,686929391  |

|           |               |              |
|-----------|---------------|--------------|
| 100529257 | SYNJ2BP-COX16 | -5,555238495 |
| 6490      | PMEL          | 2,800604113  |
| 29113     | C6orf15       | -9,273536108 |
| 79840     | NHEJ1         | 2,858927688  |
| 4046      | LSP1          | -6,31911874  |
| 7412      | VCAM1         | 3,041787586  |
| 100526767 | RNF103-CHMP3  | -5,914528223 |
| 7538      | ZFP36         | 3,284324006  |
| 100616408 | MIR5047       | -9,149896792 |
| 56475     | RPRM          | 4,091290682  |
| 5100      | PCDH8         | 2,396628988  |
| 5083      | PAX9          | -6,019853926 |
| 388555    | IGFL3         | -8,967834502 |
| 54715     | RBFOX1        | 3,042793474  |
| 64093     | SMOC1         | 2,858044286  |
| 650       | BMP2          | 2,949234406  |
| 389136    | VGLL3         | 2,830252663  |
| 100134938 | UPK3BL        | 2,520781653  |
| 100008587 | RNA5-8S5      | 4,360551281  |
| 6352      | CCL5          | 2,515728428  |
| 6913      | TBX15         | 2,716198523  |
| 3977      | LIFR          | 4,021925627  |
| 7021      | TFAP2B        | 4,208587976  |
| 5521      | PPP2R2B       | 2,712655187  |
| 2354      | FOSB          | 5,156457962  |
| 1602      | DACH1         | 2,609768782  |
| 9465      | AKAP7         | 2,704902229  |
| 7102      | TSPAN7        | 3,558730716  |
| 100190939 | TPT1-AS1      | 2,707914731  |
| 54861     | SNRK          | 2,983795741  |
| 81558     | FAM117A       | 2,896709065  |
| 6781      | STC1          | 2,995600041  |
| 6750      | SST           | 2,861956554  |

|           |              |             |
|-----------|--------------|-------------|
| 9118      | INA          | 4,297540701 |
| 107       | ADCY1        | 2,769615232 |
| 23600     | AMACR        | 3,126382137 |
| 27065     | NSG1         | 3,75373301  |
| 55203     | LGI2         | 3,095538804 |
| 3164      | NR4A1        | 5,510159342 |
| 1620      | BRINP1       | 3,63159534  |
| 7020      | TFAP2A       | 3,051315091 |
| 2045      | EPHA7        | 2,928911282 |
| 10365     | KLF2         | 3,794234591 |
| 286527    | TMSB15B      | 3,116750287 |
| 100129931 | LOC100129931 | 3,316736962 |
| 1756      | DMD          | 2,862517359 |
| 6092      | ROBO2        | 3,371657184 |
| 9980      | DOPEY2       | 3,110748155 |
| 55384     | MEG3         | 5,288915832 |
| 55619     | DOCK10       | 3,001491887 |
| 79605     | PGBD5        | 3,663618615 |
| 3038      | HAS3         | 3,114898241 |
| 163486    | DENND1B      | 4,153994732 |
| 4744      | NEFH         | 3,410125502 |
| 389073    | C2orf80      | 3,494996196 |
| 100302692 | FTX          | 5,45343972  |
| 9314      | KLF4         | 4,734443834 |
| 1745      | DLX1         | 3,165938891 |
| 7855      | FZD5         | 3,978443647 |
| 2034      | EPAS1        | 3,522494457 |
| 335       | APOA1        | 3,605686178 |
| 84708     | LNX1         | 3,293197985 |
| 23237     | ARC          | 4,018471468 |
| 353174    | ZACN         | 3,389219899 |
| 1501      | CTNND2       | 3,362832658 |
| 100132062 | LOC100132062 | 3,828378945 |



|           |             |             |
|-----------|-------------|-------------|
| 167410    | LIX1        | 3,415462565 |
| 6658      | SOX3        | 3,589961249 |
| 4488      | MSX2        | 4,203890016 |
| 55089     | SLC38A4     | 4,318538139 |
| 55268     | ECHDC2      | 3,583472607 |
| 4908      | NTF3        | 5,539812106 |
| 55790     | CSGALNACT1  | 3,529600255 |
| 8339      | HIST1H2BG   | 4,812207001 |
| 9421      | HAND1       | 4,930477861 |
| 1496      | CTNNA2      | 4,13245759  |
| 112970    | KTI12       | 3,494921842 |
| 100303728 | SLC25A5-AS1 | 3,651853517 |
| 8912      | CACNA1H     | 3,84026505  |
| 1746      | DLX2        | 3,759713298 |
| 100873954 | SNRK-AS1    | 4,759877585 |
| 2334      | AFF2        | 3,907436656 |
| 64881     | PCDH20      | 4,140978097 |
| 3429      | IFI27       | 4,347225566 |
| 5101      | PCDH9       | 4,976919858 |
| 340665    | CYP26C1     | 4,798415909 |
| 1959      | EGR2        | 6,029389468 |
| 1364      | CLDN4       | 4,179061935 |
| 138649    | ANKRD19P    | 7,647577804 |
| 100463488 | MTRNR2L10   | 5,837579524 |
| 999       | CDH1        | 4,820927101 |
| 5915      | RARB        | 4,485748956 |
| 730130    | TMEM229A    | 3,949662171 |
| 6926      | TBX3        | 4,014855775 |
| 4745      | NELL1       | 6,138919647 |
| 138046    | RALYL       | 4,319145642 |
| 57111     | RAB25       | 4,190340375 |
| 100499405 | LINC00987   | 8,20053748  |
| 5800      | PTPRO       | 5,152819878 |

|           |           |             |
|-----------|-----------|-------------|
| 202020    | TAPT1-AS1 | 6,926849892 |
| 56956     | LHX9      | 4,981374127 |
| 7471      | WNT1      | 4,877757748 |
| 84419     | C15orf48  | 4,834936304 |
| 139728    | PNCK      | 4,897429262 |
| 163404    | PLPPR5    | 4,722714002 |
| 1463      | NCAN      | 7,914949704 |
| 1960      | EGR3      | 5,812985928 |
| 9052      | GPRC5A    | 6,244896371 |
| 22874     | PLEKHA6   | 4,677518854 |
| 389125    | MUSTN1    | 6,83238865  |
| 54897     | CASZ1     | 5,512151409 |
| 339479    | BRINP3    | 6,510224617 |
| 6543      | SLC8A2    | 8,651326189 |
| 64072     | CDH23     | 5,777593715 |
| 84966     | IGSF21    | 5,943019305 |
| 65999     | LRRC61    | 5,737460705 |
| 100131187 | TSTD1     | 5,980457116 |
| 22915     | MMRN1     | 5,78518376  |
| 339488    | TFAP2E    | 6,796048879 |
| 196385    | DNAH10    | 6,31558744  |
| 100506428 | CBR3-AS1  | 10,60606961 |
| 174       | AFP       | 6,435019809 |
| 4070      | TACSTD2   | 6,109022028 |
| 2568      | GABRP     | 8,095828585 |
| 2895      | GRID2     | 6,782347759 |
| 5733      | PTGER3    | 7,529730206 |
| 8809      | IL18R1    | 6,889657783 |
| 116       | ADCYAP1   | 7,656421857 |
| 3670      | ISL1      | 7,119399351 |
| 64478     | CSMD1     | 7,100219408 |
| 25924     | MYRIP     | 7,75472351  |
| 100462983 | MTRNR2L3  | 11,22655666 |

|           |               |             |
|-----------|---------------|-------------|
| 1749      | DLX5          | 7,873741756 |
| 55655     | NLRP2         | 8,927308683 |
| NR_026650 | -             | 9,319672121 |
| 54944     | LINC01521     | 9,355901638 |
| 100505573 | INAFM2        | 10,21340804 |
| 101928378 | PTOV1-AS2     | 9,494355604 |
| 101410538 | MMP24-AS1     | 10,73788108 |
| 440416    | CCDC144NL-AS1 | 9,28424575  |
| 103344718 | HOTS          | 14,32918317 |
| 374920    | C19orf68      | 9,07881795  |
| 101927374 | LOC101927374  | 9,768597882 |
| 163702    | IFNLR1        | 9,018200179 |
| 100846978 | LINC00506     | 10,97799537 |
| 104326058 | SMAD1-AS1     | 9,321364432 |
| 644139    | PIRT          | 10,59035313 |
| 100463487 | MTRNR2L9      | 16,20308508 |
| 100506603 | LOC100506603  | 10,45481335 |
| 353511    | PKD1P6        | 11,18084157 |
| 100101440 | PMS2P7        | 9,11504365  |
| 101060376 | TBC1D3L       | 10,1179677  |
| 728769    | SCAMP1-AS1    | 8,93737382  |
| 442117    | GALNTL6       | 10,10819772 |
| 101929579 | LOC101929579  | 9,443461612 |
| 102288414 | C11orf98      | 12,75707743 |
| 100128494 | LOC100128494  | 11,08148344 |
| 554249    | LOC554249     | 9,222794903 |
| 100507347 | VIM-AS1       | 14,40715156 |
| 727751    | LOC727751     | 10,18363538 |
| 101926898 | LOC101926898  | 9,702172685 |
| 101928663 | LOC101928663  | 10,6110248  |
| 9023      | CH25H         | 11,23451809 |
| 4880      | NPPC          | 9,715533064 |
| 100506119 | LINC01503     | 9,777666281 |

|           |                        |             |
|-----------|------------------------|-------------|
| 100132815 | IPO5P1                 | 9,591522347 |
| 102724699 | LOC102724699           | 11,52454172 |
| 10590     | SCGN                   | 9,562242424 |
| 100419583 | LOC100419583           | 9,730894647 |
| 201853    | LINC00504              | 10,81398155 |
| 102723508 | KANTR                  | 13,22539575 |
| 101929147 | LOC101929147           | 9,556506055 |
| 100288162 | LOC100288162           | 10,70498432 |
| 4118      | MAL                    | 10,12960501 |
| 104413891 | SAPCD1-AS1             | 8,992938336 |
| 79679     | VTCN1                  | 9,477252324 |
| 25818     | KLK5                   | 10,027906   |
| 103021295 | LOC103021295           | 9,018895621 |
| 729348    | LOC729348              | 10,40779885 |
| 101060691 | NUTM2B-AS1             | 10,03032228 |
| 104472717 | LINC01224              | 9,06608919  |
| 102157402 | AK6                    | 10,9432474  |
| 100505621 | C11orf72               | 9,249706057 |
| 100507602 | TRIM52-AS1             | 9,947636938 |
| 100131017 | ZNF316                 | 9,712097051 |
| 100288152 | LOC100288152           | 9,077483357 |
| 388394    | RPRML                  | 9,117643101 |
| 100506365 | OTUD6B-AS1             | 9,835260919 |
| 101926889 | LOC101926889           | 8,987974524 |
| 100996301 | FOXD3-AS1              | 10,20579325 |
| 400794    | LOC400794              | 10,86418614 |
| 101927796 | LINC01441              | 8,983706193 |
| 100130964 | LOC100130964           | 11,63560477 |
| 729218    | LOC729218              | 9,118292233 |
| 103625681 | LLPH-AS1               | 8,918117851 |
| 103695435 | BBOX1-AS1              | 8,978710459 |
| 100128055 | SMARCA5-AS1            | 10,13891172 |
| 101752399 | STAG3L5P-PVRIG2P-PILRB | 9,804534403 |

|              |              |             |
|--------------|--------------|-------------|
| 100861548    | PINK1-AS     | 9,472690839 |
| 100129434    | LOC100129434 | 11,56522111 |
| 401242       | LINC01623    | 12,14950898 |
| 100129195    | ZSCAN16-AS1  | 8,990813079 |
| 246          | ALOX15       | 9,762382039 |
| 7475         | WNT6         | 9,853309555 |
| 285463       | CTBP1-AS     | 9,494355604 |
| 100652748    | TIMM23B      | 9,323617763 |
| 84777        | DLGAP1-AS2   | 9,461479447 |
| 104169670    | TMEM5-AS1    | 9,50779464  |
| 100505758    | PRMT5-AS1    | 10,31316648 |
| 101154753    | PANDAR       | 10,76735685 |
| NM_001303027 | -            | 9,635264657 |

**Supplementary Table 3.** List of genes with significantly altered expression in BVVL MNs B2 compared to BVVL MNs in RNA sequencing (fold-change  $\geq 2$  and diverge probability  $\geq 0.8$ ).

| GeneID    | Gene Symbol    | log2Ratio(BVVL B2/BVVL) |
|-----------|----------------|-------------------------|
| 9961      | MVP            | 2,403776                |
| NR_026650 | -              | -9,319672               |
| 1973      | EIF4A1         | -5,347842               |
| 200879    | LIPH           | 3,65547                 |
| 6218      | RPS17          | -6,736279               |
| 1843      | DUSP1          | -3,349839               |
| 7111      | TMOD1          | -2,481063               |
| 89        | ACTN3          | -2,928239               |
| 54944     | LINC01521      | -9,355902               |
| 100533975 | SLMO2-ATP5E    | -5,766343               |
| 29114     | TAGLN3         | -2,764192               |
| 100505573 | INAFM2         | -10,213408              |
| 79625     | NDNF           | -3,532392               |
| 7262      | PHLDA2         | 2,764245                |
| 101928378 | PTOV1-AS2      | -9,494356               |
| 260436    | FDCSP          | 8,850364                |
| 1018      | CDK3           | -6,526985               |
| 59284     | CACNG7         | -2,724887               |
| 9241      | NOG            | -2,766305               |
| 3880      | KRT19          | -4,472748               |
| 1535      | CYBA           | 1,548725                |
| 1271      | CNTFR          | -2,150302               |
| 100534595 | HNRNPUL2-BSCL2 | -4,139189               |
| 5476      | CTSA           | 2,063259                |
| 4191      | MDH2           | 1,592713                |
| 5354      | PLP1           | -4,256153               |
| 63915     | BLOC1S5        | -4,819519               |
| 28984     | RGCC           | -3,900536               |
| 51652     | CHMP3          | -3,840997               |
| 23220     | DTX4           | -3,684456               |

|           |              |            |
|-----------|--------------|------------|
| 5502      | PPP1R1A      | -3,585388  |
| 60482     | SLC5A7       | 4,60601    |
| 58189     | WFDC1        | 3,383053   |
| 92162     | TMEM88       | -2,114781  |
| 84973     | SNHG7        | -1,600348  |
| 100008588 | RNA18S5      | -16,286337 |
| 5121      | PCP4         | 2,798583   |
| 81493     | SYNC         | -5,171966  |
| 100462977 | MTRNR2L1     | 3,368861   |
| 93099     | DMKN         | -3,548625  |
| 10457     | GPNMB        | 2,225328   |
| 6189      | RPS3A        | -2,285126  |
| 101410538 | MMP24-AS1    | -10,737881 |
| 54873     | PALMD        | 4,538952   |
| 726       | CAPN5        | 2,190846   |
| 1909      | EDNRA        | -3,245021  |
| 4804      | NGFR         | -2,716186  |
| 9636      | ISG15        | 4,59647    |
| 80864     | EGFL8        | -6,258497  |
| 55240     | STEAP3       | 2,052554   |
| 100129931 | LOC100129931 | -7,916356  |
| 199990    | FAAP20       | -2,001137  |
| 2969      | GTF2I        | -1,980813  |
| 1000      | CDH2         | -1,794145  |
| 3955      | LFNG         | -3,382148  |
| 84992     | PIGY         | -12,694467 |
| 8370      | HIST2H4A     | -9,316282  |
| 5441      | POLR2L       | 1,869113   |
| 57584     | ARHGAP21     | 1,670128   |
| 51015     | ISOC1        | 1,67598    |
| 10346     | TRIM22       | 2,079655   |
| 132228    | LSMEM2       | -5,12896   |
| 2681      | GGTA1P       | 4,267405   |

|           |               |            |
|-----------|---------------|------------|
| 7335      | UBE2V1        | -2,768256  |
| 1959      | EGR2          | -4,724287  |
| 100133286 | LOC100133286  | -4,799653  |
| 6235      | RPS29         | -1,987381  |
| 54843     | SYTL2         | -2,956777  |
| 6892      | TAPBP         | 3,032562   |
| 440416    | CCDC144NL-AS1 | -9,284246  |
| 353174    | ZACN          | -7,909492  |
| 103344718 | HOTS          | -14,329183 |
| 80024     | SLC8B1        | 2,33489    |
| 102606465 | LOC102606465  | -8,800091  |
| 11274     | USP18         | 2,913929   |
| 83604     | TMEM47        | -2,398514  |
| 283070    | -             | 10,159297  |
| 85477     | SCIN          | 4,820956   |
| 6423      | SFRP2         | -3,427913  |
| 23237     | ARC           | -5,483852  |
| 7040      | TGFB1         | 2,9082     |
| 948       | CD36          | 4,722996   |
| 139728    | PNCK          | -4,908735  |
| 374920    | C19orf68      | -9,078818  |
| 6297      | SALL2         | -1,778142  |
| 5788      | PTPRC         | 4,856814   |
| 94030     | LRRC4B        | -3,048388  |
| 9249      | DHRS3         | 4,058986   |
| 84141     | EVA1A         | 4,404472   |
| 57595     | PDZD4         | -3,011632  |
| 378938    | MALAT1        | 4,66561    |
| 100137049 | PLA2G4B       | -5,668897  |
| 387885    | CFAP73        | -7,041027  |
| 101927374 | LOC101927374  | -9,768598  |
| 56829     | ZC3HAV1       | 2,332265   |
| 6772      | STAT1         | 1,738522   |



|           |         |           |
|-----------|---------|-----------|
| 6173      | RPL36A  | -2,602384 |
| NR_123729 | -       | -8,701306 |
| 54715     | RBFOX1  | -2,013141 |
| 84219     | WDR24   | 9,800334  |
| 5721      | PSME2   | 2,250889  |
| 6288      | SAA1    | 4,377134  |
| 23217     | ZFR2    | -4,112013 |
| 1375      | CPT1B   | -2,482188 |
| 200030    | NBPF11  | -7,102583 |
| 117581    | TWIST2  | 3,091844  |
| 4811      | NID1    | 1,669171  |
| 128414    | NKAIN4  | -3,311024 |
| 51296     | SLC15A3 | 2,326279  |
| 7546      | ZIC2    | -2,088169 |
| 4938      | OAS1    | 6,949167  |
| 56896     | DPYSL5  | -1,89418  |
| 6347      | CCL2    | 4,233642  |
| 85441     | HELZ2   | 2,876907  |
| 2354      | FOSB    | -5,576539 |
| 5100      | PCDH8   | -2,337651 |
| 648       | BMI1    | -2,639341 |
| 5320      | PLA2G2A | 2,852758  |
| 51191     | HERC5   | 4,793534  |
| 1316      | KLF6    | -1,755654 |
| 4072      | EPCAM   | -2,660952 |
| 112970    | KTI12   | -8,085233 |
| 114904    | C1QTNF6 | 1,91421   |
| 55384     | MEG3    | -3,956718 |
| 10791     | VAMP5   | 1,794516  |
| 29970     | SCHIP1  | -5,708589 |
| 10437     | IFI30   | 4,060475  |
| 5764      | PTN     | -3,273175 |
| 51252     | FAM178B | 3,076803  |

|           |                |            |
|-----------|----------------|------------|
| 597       | BCL2A1         | 6,220379   |
| 100846978 | LINC00506      | -10,977995 |
| 100302652 | GPR75-ASB3     | -4,348204  |
| 245973    | ATP6V1C2       | -5,926897  |
| 100534599 | ISY1-RAB43     | -5,143196  |
| 6474      | SHOX2          | 2,601753   |
| 55220     | KLHDC8A        | -3,734171  |
| 629       | CFB            | 3,655996   |
| 104326058 | SMAD1-AS1      | -9,321364  |
| 100996928 | C7orf55-LUC7L2 | -7,558207  |
| 284889    | MIF-AS1        | -3,836282  |
| 10365     | KLF2           | -2,508831  |
| 378706    | RN7SL2         | 2,950643   |
| 317762    | CCDC85C        | -2,083138  |
| 54541     | DDIT4          | -1,836587  |
| 26024     | PTCD1          | -6,201927  |
| 100463487 | MTRNR2L9       | -16,203085 |
| 4792      | NFKBIA         | 2,059094   |
| 81567     | TXNDC5         | -3,627238  |
| 6700      | SPRR2A         | 7,334723   |
| 3315      | HSPB1          | 1,722369   |
| 5918      | RARRES1        | 3,80559    |
| 55750     | AGK            | 1,903456   |
| 644714    | LIMD1-AS1      | -6,71154   |
| 3732      | CD82           | -1,921829  |
| 586       | BCAT1          | -2,005644  |
| 50486     | GOS2           | 3,163531   |
| 283820    | NOMO2          | -1,93361   |
| 7162      | TPBG           | -2,291508  |
| 100506603 | LOC100506603   | -10,454813 |
| 84933     | C8orf76        | -2,334553  |
| 57829     | ZP4            | 2,824445   |
| 387597    | ILDR2          | -5,498934  |

|           |                  |            |
|-----------|------------------|------------|
| 23213     | SULF1            | 3,282918   |
| 64135     | IFIH1            | 5,937452   |
| 353511    | PKD1P6           | -11,180842 |
| 3800      | KIF5C            | -2,784261  |
| 1036      | CDO1             | -3,293261  |
| 7855      | FZD5             | 1,973131   |
| 64093     | SMOC1            | -4,058711  |
| 3107      | HLA-C            | 2,563957   |
| 1949      | EFNB3            | -2,027643  |
| 3791      | KDR              | 3,618222   |
| 23304     | UBR2             | 2,039758   |
| 5318      | PKP2             | -3,635008  |
| 9448      | MAP4K4           | 1,876636   |
| 3398      | ID2              | -1,7543    |
| 567       | B2M              | 3,608688   |
| 401251    | SAPCD1           | -8,769838  |
| 26579     | MYEOV            | 6,406419   |
| 10561     | IFI44            | 5,786873   |
| 4741      | NEFM             | -1,938815  |
| 100008589 | RNA28S5          | -17,948665 |
| 100101440 | PMS2P7           | -9,115044  |
| 101060376 | TBC1D3L          | -10,117968 |
| 3133      | HLA-E            | 2,154227   |
| 100861402 | CERS6-AS1        | -8,272034  |
| 25927     | CNRIP1           | 2,236451   |
| 136227    | COL26A1          | -2,375949  |
| 728769    | SCAMP1-AS1       | -8,937374  |
| 124976    | SPNS2            | -5,038268  |
| 102800317 | LOC400927-CSNK1E | -8,762382  |
| 3188      | HNRNPH2          | -2,675782  |
| 100093631 | GTF2IP4          | -4,039647  |
| 6233      | RPS27A           | -1,537883  |
| 2274      | FHL2             | 2,404199   |

|           |             |            |
|-----------|-------------|------------|
| 2045      | EPHA7       | -2,259289  |
| 57533     | TBC1D14     | -1,938188  |
| 79132     | DHX58       | 5,965917   |
| 10866     | HCP5        | 4,482615   |
| 653247    | PRB2        | 5,220556   |
| 4613      | MYCN        | -2,160392  |
| 100532731 | COMMD3-BMI1 | -5,189005  |
| 3665      | IRF7        | 3,621644   |
| 8848      | TSC22D1     | -2,183991  |
| 10516     | FBLN5       | 2,929128   |
| 3428      | IFI16       | 3,287083   |
| 6490      | PMEL        | -2,155267  |
| 81848     | SPRY4       | 2,017166   |
| 171019    | ADAMTS19    | -4,557624  |
| 10912     | GADD45G     | -2,497857  |
| 140597    | TCEAL2      | -2,993905  |
| 58498     | MYL7        | -3,575905  |
| 467       | ATF3        | -1,938822  |
| 11177     | BAZ1A       | 1,734288   |
| 4831      | NME2        | -1,616486  |
| 145845    | LOC145845   | -8,015409  |
| 94240     | EPSTI1      | 3,903703   |
| 8106      | PABPN1      | -2,005983  |
| 10581     | IFITM2      | 2,319598   |
| 6658      | SOX3        | -3,931678  |
| 837       | CASP4       | 4,113203   |
| 79008     | SLX1B       | -11,128317 |
| 6774      | STAT3       | 1,748515   |
| 6206      | RPS12       | -1,546973  |
| 25791     | NGEF        | 2,947489   |
| 8807      | IL18RAP     | 3,545563   |
| 10150     | MBNL2       | 2,355055   |
| 716       | C1S         | 3,595198   |

|           |              |            |
|-----------|--------------|------------|
| 101929579 | LOC101929579 | -9,443462  |
| 2014      | EMP3         | 1,587956   |
| 723790    | HIST2H2AA4   | -10,791366 |
| 284618    | RUSC1-AS1    | -3,66647   |
| 3553      | IL1B         | 8,776761   |
| 2022      | ENG          | 2,18984    |
| 8363      | HIST1H4J     | -3,524786  |
| 6484      | ST3GAL4      | 2,005557   |
| 102288414 | C11orf98     | -12,757077 |
| 100128494 | LOC100128494 | -11,081483 |
| 100134934 | TEN1         | -10,636851 |
| 5698      | PSMB9        | 8,234866   |
| 199713    | NLRP7        | 4,440091   |
| 347475    | CCDC160      | -2,857136  |
| 79953     | SYNDIG1      | 1,979085   |
| 9353      | SLIT2        | 2,093924   |
| 79856     | SNX22        | -4,486246  |
| 57687     | VAT1L        | -4,175576  |
| 51050     | PI15         | 4,273174   |
| 7919      | DDX39B       | -3,944068  |
| 6695      | SPOCK1       | 2,225307   |
| 4939      | OAS2         | 7,985459   |
| 767558    | LUZP6        | -12,386267 |
| 8737      | RIPK1        | 2,363226   |
| 286527    | TMSB15B      | -2,079965  |
| 124944    | C17orf49     | -2,770885  |
| 100506474 | LOC100506474 | 4,76755    |
| 4326      | MMP17        | 1,803101   |
| 9518      | GDF15        | 4,15664    |
| 55601     | DDX60        | 3,750961   |
| 56670     | SUCNR1       | 2,337155   |
| 55008     | HERC6        | 5,865419   |
| 249       | ALPL         | -2,11167   |

|           |              |            |
|-----------|--------------|------------|
| 440926    | H3F3AP4      | -4,002477  |
| 5355      | PLP2         | 2,069078   |
| 112398    | EGLN2        | -3,523498  |
| 145553    | MDP1         | -2,277178  |
| 1756      | DMD          | -2,234152  |
| 114814    | GNRHR2       | -3,740127  |
| 23780     | APOL2        | 3,290954   |
| 23302     | WSCD1        | -3,393237  |
| 554249    | LOC554249    | -9,222795  |
| 6672      | SP100        | 4,628443   |
| 3956      | LGALS1       | 2,595272   |
| 2012      | EMP1         | 2,831585   |
| 55969     | C20orf24     | -2,441681  |
| 100507347 | VIM-AS1      | -14,407152 |
| 8788      | DLK1         | -2,358103  |
| 6606      | SMN1         | -2,095238  |
| 101927746 | LOC101927746 | -8,668885  |
| 9843      | HEPH         | -2,267376  |
| 2633      | GBP1         | 7,440358   |
| 2790      | GNG10        | -3,338361  |
| 1958      | EGR1         | -3,821955  |
| 29780     | PARVB        | 2,290519   |
| 51540     | SCLY         | -3,561918  |
| 727751    | LOC727751    | -10,183635 |
| 101926898 | LOC101926898 | -9,702173  |
| 112616    | CMTM7        | 1,600014   |
| 574042    | SNORA10      | 5,401663   |
| 692158    | SNORA57      | 5,066564   |
| 6422      | SFRP1        | -2,390303  |
| 101929074 | PIK3CD-AS2   | -8,881114  |
| 53916     | RAB4B        | -9,433462  |
| 138046    | RALYL        | -2,927219  |
| 101928663 | LOC101928663 | -10,611025 |

|           |              |            |
|-----------|--------------|------------|
| 654483    | BOLA2B       | -11,405673 |
| 12        | SERPINA3     | 7,528357   |
| 57633     | LRRN1        | -2,507644  |
| 5992      | RFX4         | -2,779182  |
| 79081     | LBHD1        | 4,032308   |
| 9445      | ITM2B        | 1,535578   |
| 653689    | GSTT2B       | -6,52023   |
| 7076      | TIMP1        | 2,71667    |
| 23090     | ZNF423       | -2,070386  |
| 3178      | HNRNPA1      | -1,558393  |
| 115265    | DDIT4L       | 3,615004   |
| 3669      | ISG20        | 5,768445   |
| 56963     | RGMA         | -2,10201   |
| 9528      | TMEM59       | 1,67351    |
| 100506119 | LINC01503    | -9,777666  |
| 100132815 | IPO5P1       | -9,591522  |
| 8651      | SOCS1        | 2,433701   |
| 57194     | ATP10A       | 3,385445   |
| 100529261 | CHURC1-FNTB  | -7,914552  |
| 100131205 | RPL21P28     | 2,059287   |
| 10653     | SPINT2       | -2,147894  |
| 114769    | CARD16       | 5,095071   |
| 102724699 | LOC102724699 | -11,524542 |
| 6775      | STAT4        | 4,146887   |
| 11013     | TMSB15A      | -2,358747  |
| 100134938 | UPK3BL       | -3,855671  |
| 90326     | THAP3        | -2,050704  |
| 151636    | DTX3L        | 4,142291   |
| 2568      | GABRP        | -7,868666  |
| 389073    | C2orf80      | 1,798072   |
| 7178      | TPT1         | 1,835729   |
| 100419583 | LOC100419583 | -9,730895  |
| 26580     | BSCL2        | -2,42345   |

|           |           |            |
|-----------|-----------|------------|
| 7130      | TNFAIP6   | 4,027131   |
| 1592      | CYP26A1   | 2,44465    |
| 126328    | NDUFA11   | -1,567895  |
| 5413      | SEPT5     | -4,729317  |
| 24138     | IFIT5     | 2,036204   |
| 201853    | LINC00504 | -10,813982 |
| 174       | AFP       | -3,527477  |
| 10123     | ARL4C     | -2,255472  |
| 6139      | RPL17     | -1,786243  |
| 163486    | DENND1B   | -3,390341  |
| 6515      | SLC2A3    | -2,554337  |
| 6237      | RRAS      | 1,715122   |
| 51131     | PHF11     | 2,301532   |
| 120237    | DBX1      | -7,246778  |
| 5936      | RBM4      | -2,238184  |
| 9695      | EDEM1     | 2,951097   |
| 1364      | CLDN4     | -3,629043  |
| 151230    | KLHL23    | -6,048275  |
| 23559     | WBP1      | -3,474082  |
| 684       | BST2      | 4,403953   |
| 7127      | TNFAIP2   | 2,548532   |
| 6769      | STAC      | 3,947144   |
| 126868    | MAB21L3   | 3,295627   |
| 999       | CDH1      | -4,020208  |
| 4599      | MX1       | 6,744828   |
| 9890      | PLPPR4    | 1,813674   |
| 102723508 | KANTR     | -13,225396 |
| 83666     | PARP9     | 3,721344   |
| 5359      | PLSCR1    | 3,151582   |
| 84220     | RGPD5     | -4,956986  |
| 129607    | CMPK2     | 4,369614   |
| 167826    | OLIG3     | -2,837107  |
| 388152    | GOLGA2P7  | -2,519328  |



|           |                |            |
|-----------|----------------|------------|
| 101929147 | LOC101929147   | -9,556506  |
| 100288162 | LOC100288162   | -10,704984 |
| 57216     | VANGL2         | -1,711482  |
| 100302692 | FTX            | -6,084344  |
| 3020      | H3F3A          | -3,965134  |
| 7276      | TTR            | -3,83083   |
| 1404      | HAPLN1         | -2,916899  |
| 80755     | AARSD1         | -4,580722  |
| 2619      | GAS1           | -2,183381  |
| 6477      | SIAH1          | -2,287096  |
| 7044      | LEFTY2         | 3,044349   |
| 4062      | LY6H           | -5,106483  |
| 1280      | COL2A1         | -2,159575  |
| 6876      | TAGLN          | -3,382011  |
| 7980      | TFPI2          | 7,246089   |
| 6607      | SMN2           | -2,27157   |
| 100526694 | MSANTD3-TMEFF1 | -6,347594  |
| 23645     | PPP1R15A       | -1,585767  |
| 347733    | TUBB2B         | -2,766179  |
| 692224    | FBXO22-AS1     | -10,107016 |
| 4118      | MAL            | 1,759306   |
| 390       | RND3           | -1,664608  |
| 1515      | CTSV           | -3,576109  |
| 104413891 | SAPCD1-AS1     | -8,992938  |
| 3725      | JUN            | -3,145091  |
| 84171     | LOXL4          | 3,63024    |
| 10630     | PDPN           | 1,802589   |
| 388       | RHOB           | -2,841365  |
| 9180      | OSMR           | 2,496183   |
| 401138    | AMTN           | 3,204745   |
| 6029      | RN7SL1         | 3,596719   |
| 1075      | CTSC           | -1,725949  |
| 171425    | CLYBL          | -2,854928  |

|           |          |           |
|-----------|----------|-----------|
| 401944    | LDLRAD2  | -4,690769 |
| 10133     | OPTN     | 1,726562  |
| 10964     | IFI44L   | 6,296332  |
| 4055      | LTBR     | 2,655651  |
| 56603     | CYP26B1  | 2,411061  |
| 5634      | PRPS2    | 1,856906  |
| 8926      | SNURF    | -5,361119 |
| 131405    | TRIM71   | -3,556446 |
| 6524      | SLC5A2   | -6,020772 |
| 9976      | CLEC2B   | 5,966409  |
| 5602      | MAPK10   | -4,282542 |
| 5098      | PCDHGC3  | -2,898711 |
| 388524    | RPSAP58  | -1,833157 |
| 3959      | LGALS3BP | 3,017845  |
| 6634      | SNRPD3   | 1,713383  |
| 100190939 | TPT1-AS1 | -2,213057 |
| 54809     | SAMD9    | 5,792475  |
| 25878     | MXRA5    | 2,415149  |
| 25939     | SAMHD1   | 3,33443   |
| 3106      | HLA-B    | 4,196043  |
| 79679     | VTCN1    | -8,171419 |
| 8577      | TMEFF1   | -4,394266 |
| 2034      | EPAS1    | -5,068316 |
| 64761     | PARP12   | 4,453409  |
| 8519      | IFITM1   | 5,722491  |
| 91461     | PKDCC    | -3,573762 |
| 1890      | TYMP     | 4,157161  |
| 4681      | NBL1     | -3,959075 |
| 8324      | FZD7     | -1,81996  |
| 3489      | IGFBP6   | 2,95155   |
| 90050     | FAM181A  | -6,301432 |
| 51513     | ETV7     | 6,202893  |
| 6398      | SECTM1   | 2,21416   |

|           |              |            |
|-----------|--------------|------------|
| 3430      | IFI35        | 6,269871   |
| 400916    | CHCHD10      | 2,069313   |
| 100271927 | RASA4B       | -4,765233  |
| 8337      | HIST2H2AA3   | -10,791366 |
| 92369     | SPSB4        | 2,133346   |
| 80154     | GOLGA2P10    | -2,708614  |
| 92293     | TMEM132C     | -3,650653  |
| 1400      | CRMP1        | -1,620692  |
| 103021295 | LOC103021295 | -9,018896  |
| 635       | BHMT         | 5,597346   |
| 3875      | KRT18        | -1,622977  |
| 94239     | H2AFV        | -1,636084  |
| 341640    | FREM2        | -3,981074  |
| 3672      | ITGA1        | 2,365111   |
| 9592      | IER2         | -2,663636  |
| 114984    | FLYWCH2      | 1,651202   |
| 4110      | MAGEA11      | 2,247265   |
| 3576      | CXCL8        | 2,957917   |
| 729348    | LOC729348    | -10,407799 |
| 624       | BDKRB2       | 4,264922   |
| 7453      | WARS         | 1,845063   |
| 151195    | CCNYL1       | 1,980044   |
| 6227      | RPS21        | -1,967522  |
| 23779     | ARHGAP8      | -4,253004  |
| 2073      | ERCC5        | -3,058802  |
| 150094    | SIK1         | -3,003239  |
| 101060691 | NUTM2B-AS1   | -10,030322 |
| 2118      | ETV4         | 1,831974   |
| 1153      | CIRBP        | -1,658558  |
| 762       | CA4          | 3,644237   |
| 5281      | PIGF         | -2,2774    |
| 874       | CBR3         | 3,296767   |
| 202020    | TAPT1-AS1    | -6,585008  |

|           |           |            |
|-----------|-----------|------------|
| 1026      | CDKN1A    | 2,265842   |
| 1469      | CST1      | -4,261129  |
| 79570     | NKAIN1    | -2,269961  |
| 6519      | SLC3A1    | -7,504968  |
| 6737      | TRIM21    | 1,994063   |
| 286204    | CRB2      | -3,455098  |
| 4070      | TACSTD2   | -6,749994  |
| 761       | CA3       | -2,96991   |
| 83543     | AIF1L     | -2,373119  |
| 201780    | SLC10A4   | 2,62421    |
| 5260      | PHKG1     | -4,101831  |
| 7471      | WNT1      | -5,806407  |
| 79825     | EFCC1     | -5,943101  |
| 91653     | BOC       | -2,260439  |
| 6781      | STC1      | -2,645292  |
| 100499405 | LINC00987 | -8,359963  |
| 23261     | CAMTA1    | -2,829369  |
| 124641    | OVCA2     | -2,146078  |
| 3429      | IFI27     | 6,197897   |
| 1992      | SERPINB1  | 2,438243   |
| 389125    | MUSTN1    | -3,849662  |
| 104472717 | LINC01224 | -9,066089  |
| 10379     | IRF9      | 3,143155   |
| 57111     | RAB25     | -3,525457  |
| 1420      | CRYGC     | 9,302957   |
| 3437      | IFIT3     | 5,842473   |
| 677805    | SNORA18   | 10,663274  |
| 6890      | TAP1      | 4,448698   |
| 3400      | ID4       | -2,763842  |
| 102157402 | AK6       | -10,943247 |
| 5641      | LGMN      | 1,64658    |
| 8638      | OASL      | 8,326284   |
| 3910      | LAMA4     | 1,65938    |

|           |              |           |
|-----------|--------------|-----------|
| 857       | CAV1         | 2,129229  |
| 554313    | HIST2H4B     | -9,316282 |
| 145741    | C2CD4A       | 2,897606  |
| 100506428 | CBR3-AS1     | -7,011826 |
| 618       | BCYRN1       | 7,758791  |
| 6023      | RMRP         | 6,021285  |
| 22915     | MMRN1        | -5,505762 |
| 30851     | TAX1BP3      | -2,714261 |
| 29907     | SNX15        | -5,815621 |
| 388125    | C2CD4B       | 4,293066  |
| 6160      | RPL31        | -2,514006 |
| 5292      | PIM1         | -2,049791 |
| 4940      | OAS3         | 6,075001  |
| 477       | ATP1A2       | -2,947311 |
| 6663      | SOX10        | -5,483666 |
| 8542      | APOL1        | 4,682304  |
| 6229      | RPS24        | -2,491896 |
| 1463      | NCAN         | -2,007647 |
| 1029      | CDKN2A       | 2,194764  |
| 11165     | NUDT3        | -2,364047 |
| 730394    | GTF2H2C_2    | -2,503149 |
| 6580      | SLC22A1      | 6,747403  |
| 1947      | EFNB1        | -1,826817 |
| 6654      | SOS1         | 1,833948  |
| 129080    | EMID1        | -2,367219 |
| 1052      | CEBPD        | 2,662263  |
| 100505621 | C11orf72     | -9,249706 |
| 100507602 | TRIM52-AS1   | -9,947637 |
| 290       | ANPEP        | 2,978641  |
| 100131017 | ZNF316       | -9,712097 |
| 25825     | BACE2        | 1,952295  |
| 283659    | PRTG         | -2,806193 |
| 100288152 | LOC100288152 | -9,077483 |

|           |               |           |
|-----------|---------------|-----------|
| 8404      | SPARCL1       | 2,550766  |
| 29057     | FAM156A       | -3,071577 |
| 7025      | NR2F1         | -3,105622 |
| 6549      | SLC9A2        | 5,933352  |
| 81788     | NUAK2         | -3,308658 |
| 100507424 | LOC100507424  | -3,275037 |
| 2649      | NR6A1         | -4,433    |
| 9829      | DNAJC6        | 2,092385  |
| 1960      | EGR3          | -4,189412 |
| 390992    | HES3          | -3,486053 |
| 3569      | IL6           | 4,154347  |
| 10519     | CIB1          | 1,619558  |
| 5420      | PODXL         | -2,838553 |
| 84163     | GTF2IRD2      | -4,99046  |
| 10148     | EBI3          | 4,341349  |
| 25925     | ZNF521        | -2,656231 |
| 9421      | HAND1         | -5,951421 |
| 3856      | KRT8          | -2,971037 |
| 101928649 | CTC-338M12.4  | -8,704768 |
| 3897      | L1CAM         | -3,820273 |
| 6657      | SOX2          | -2,120856 |
| 1381      | CRABP1        | -2,906016 |
| 54437     | SEMA5B        | -4,155146 |
| 83690     | CRISPLD1      | 1,562102  |
| 81557     | MAGED4B       | -7,613836 |
| 5652      | PRSS8         | -2,822517 |
| 9118      | INA           | -1,903143 |
| 441381    | LRRC24        | -3,932548 |
| 1373      | CPS1          | 2,062607  |
| 388394    | RPRML         | -4,409391 |
| 3490      | IGFBP7        | 2,309598  |
| 100529063 | BCL2L2-PABPN1 | -8,580946 |
| 11217     | AKAP2         | -7,471955 |

|           |               |            |
|-----------|---------------|------------|
| 4696      | NDUFA3        | 1,577589   |
| 79727     | LIN28A        | -1,797211  |
| 8663      | EIF3C         | -4,379989  |
| 100506365 | OTUD6B-AS1    | -9,835261  |
| 84216     | TMEM117       | 3,197562   |
| 4008      | LMO7          | 2,622057   |
| 402665    | IGLON5        | -2,954641  |
| 7280      | TUBB2A        | -2,285365  |
| 8536      | CAMK1         | 1,917992   |
| 358       | AQP1          | -3,381048  |
| 60489     | APOBEC3G      | 2,843896   |
| 94009     | SERHL         | -5,476333  |
| 6204      | RPS10         | -1,911872  |
| 158960    | CH17-340M24.3 | -8,642954  |
| 25843     | MOB4          | -3,427906  |
| 100873965 | MED4-AS1      | -5,850481  |
| 114928    | GPRASP2       | -4,112089  |
| 57169     | ZNFX1         | 2,711711   |
| 4061      | LY6E          | 2,165414   |
| 2537      | IFI6          | 5,620465   |
| 55337     | C19orf66      | 4,025095   |
| 9111      | NMI           | 3,133762   |
| 101926889 | LOC101926889  | -8,987975  |
| 5998      | RGS3          | -2,022334  |
| 55861     | DBNDD2        | -3,653646  |
| 2558      | GABRA5        | 4,477427   |
| 100996301 | FOXD3-AS1     | -10,205793 |
| 445329    | SULT1A4       | -6,624207  |
| 3164      | NR4A1         | -4,742144  |
| 100873954 | SNRK-AS1      | -6,83671   |
| 100008587 | RNA5-8S5      | -13,048998 |
| 3431      | SP110         | 3,880479   |
| 400794    | LOC400794     | -10,212101 |

|           |              |            |
|-----------|--------------|------------|
| 100302739 | PCNA-AS1     | -9,885162  |
| 3627      | CXCL10       | 7,091449   |
| 10447     | FAM3C        | 1,700942   |
| 652       | BMP4         | -2,426614  |
| 101928062 | LINC01481    | -8,795228  |
| 440823    | MIAT         | -2,885952  |
| 58472     | SQRDL        | 3,718721   |
| 1001      | CDH3         | -3,187117  |
| 10537     | UBD          | 6,643581   |
| 101927796 | LINC01441    | -8,983706  |
| 554282    | FAM72C       | -8,703904  |
| 100170229 | SRRM5        | -4,712937  |
| 100132062 | LOC100132062 | -4,289659  |
| 441454    | LOC441454    | 4,74257    |
| 563       | AZGP1        | 4,293495   |
| 57412     | AS3MT        | -4,147029  |
| 7164      | TPD52L1      | 3,182463   |
| 2180      | ACSL1        | 2,379191   |
| 5696      | PSMB8        | 5,356934   |
| 55843     | ARHGAP15     | 3,333521   |
| 80712     | ESX1         | 4,381949   |
| 729218    | LOC729218    | -9,118292  |
| 84969     | TOX2         | 2,248104   |
| 728492    | SERF1B       | -6,812252  |
| 55531     | ELMOD1       | 1,748797   |
| 103625681 | LLPH-AS1     | -8,918118  |
| 1374      | CPT1A        | 3,057205   |
| 103695435 | BBOX1-AS1    | -8,97871   |
| 4862      | NPAS2        | 3,425746   |
| 654364    | NME1-NME2    | -3,233889  |
| 729438    | GATSL2       | -7,054841  |
| 100128055 | SMARCA5-AS1  | -10,138912 |
| 9074      | CLDN6        | -2,376995  |



|           |                        |           |
|-----------|------------------------|-----------|
| 7318      | UBA7                   | 3,543325  |
| 7832      | BTG2                   | -1,940943 |
| 6656      | SOX1                   | -6,827219 |
| 1490      | CTGF                   | -3,254859 |
| 81894     | SLC25A28               | 2,075732  |
| 25764     | HYPK                   | -6,510652 |
| 4675      | NAP1L3                 | 1,984447  |
| 101752399 | STAG3L5P-PVRIG2P-PILRB | -9,804534 |
| 9830      | TRIM14                 | 3,945601  |
| 100507118 | PRC1-AS1               | -3,547136 |
| 389658    | FAM150A                | 5,173619  |
| 100750247 | HIF1A-AS2              | -8,416955 |
| 728239    | MAGED4                 | -5,937046 |
| 4782      | NFIC                   | 1,895285  |
| 154791    | FMC1                   | -2,150518 |
| 404665    | CACTIN-AS1             | -4,324216 |
| 10874     | NMU                    | 1,999991  |
| 51083     | GAL                    | 2,218875  |
| 1728      | NQO1                   | 1,694718  |
| 220869    | CBWD5                  | -3,460367 |
| 27319     | BHLHE22                | 2,453934  |
| 6750      | SST                    | -4,330637 |
| 130733    | TMEM178A               | 1,723609  |
| 101927027 | LOC101927027           | -8,686501 |
| 5266      | PI3                    | 7,140282  |
| 3481      | IGF2                   | -4,180004 |
| 26292     | MYCBP                  | -2,868599 |
| 162394    | SLFN5                  | 2,427618  |
| 90525     | SHF                    | -2,100386 |
| 602       | BCL3                   | 2,92484   |
| 57348     | TTYH1                  | -2,037325 |
| 387680    | WASHC2A                | -3,211832 |
| 100526830 | SLX1A-SULT1A3          | -5,123161 |

|           |              |            |
|-----------|--------------|------------|
| 4502      | MT2A         | 2,591576   |
| 4666      | NACA         | -2,543413  |
| 780851    | SNORD3A      | 2,972243   |
| 53826     | FXYD6        | -1,93588   |
| 100861548 | PINK1-AS     | -9,472691  |
| 10439     | OLFM1        | -3,628722  |
| 2261      | FGFR3        | -2,691608  |
| 6638      | SNRPN        | -6,280435  |
| 3785      | KCNQ2        | -4,143675  |
| 715       | C1R          | 3,443558   |
| 23117     | NPIP3        | -2,897193  |
| 23224     | SYNE2        | -2,666906  |
| 100526737 | RBM14-RBM4   | -4,892469  |
| 677822    | SNORA40      | 9,230623   |
| 654320    | SNORA8       | 6,253772   |
| 8809      | IL18R1       | 2,11343    |
| 100462983 | MTRNR2L3     | -9,440644  |
| 3055      | HCK          | 3,447397   |
| 100129434 | LOC100129434 | -11,565221 |
| 100874222 | RNF219-AS1   | -8,243075  |
| 3434      | IFIT1        | 4,169332   |
| 7268      | TTC4         | -2,615057  |
| 401242    | LINC01623    | -11,155409 |
| 100129195 | ZSCAN16-AS1  | -8,990813  |
| 9997      | SCO2         | -3,428346  |
| 4060      | LUM          | -5,949967  |
| 246       | ALOX15       | 1,901169   |
| 5610      | EIF2AK2      | 2,366487   |
| 3241      | HPCAL1       | 1,616548   |
| 54795     | TRPM4        | 2,268637   |
| 84875     | PARP10       | 3,971632   |
| 796       | CALCA        | 5,14102    |
| 2733      | GLE1         | 1,772384   |

|           |                |            |
|-----------|----------------|------------|
| 57048     | PLSCR3         | -2,483513  |
| 100463488 | MTRNR2L10      | -6,875094  |
| 100861532 | RNA45S5        | 2,066891   |
| 79583     | TMEM231        | -4,760446  |
| 9211      | LGI1           | -2,452381  |
| 6891      | TAP2           | 2,594136   |
| 138649    | ANKRD19P       | -7,986238  |
| 84154     | RPF2           | 1,836614   |
| 3988      | LIPA           | 2,083287   |
| 9580      | SOX13          | -2,270484  |
| 11211     | FZD10          | -5,800205  |
| 285463    | CTBP1-AS       | -9,494356  |
| 2048      | EPHB2          | -3,020208  |
| 84632     | AFAP1L2        | 2,552559   |
| 100652748 | TIMM23B        | -9,323618  |
| 100303728 | SLC25A5-AS1    | -3,76168   |
| 548593    | SLX1A          | -11,128317 |
| 54625     | PARP14         | 3,559314   |
| 375295    | LINC01116      | 3,198211   |
| 3383      | ICAM1          | 4,846643   |
| 2970      | GTF2IP1        | -4,211454  |
| 100529097 | RPL36A-HNRNPH2 | -4,883322  |
| 100507577 | LOC100507577   | -2,865746  |
| 84777     | DLGAP1-AS2     | -9,461479  |
| 4907      | NT5E           | 5,487778   |
| 10410     | IFITM3         | 3,677345   |
| 7070      | THY1           | 2,30932    |
| 56521     | DNAJC12        | 2,319753   |
| 7538      | ZFP36          | -1,78519   |
| 4744      | NEFH           | 2,366939   |
| 11166     | SOX21          | -5,869803  |
| 10468     | FST            | -2,189431  |
| 27022     | FOXD3          | -5,108014  |

|           |                 |            |
|-----------|-----------------|------------|
| 5205      | ATP8B1          | 4,197005   |
| 95        | ACY1            | -2,865205  |
| 8293      | SERF1A          | -7,104754  |
| 7903      | ST8SIA4         | 3,374392   |
| 340665    | CYP26C1         | -7,186233  |
| 7168      | TPM1            | -2,349985  |
| 51631     | LUC7L2          | -2,191251  |
| 85495     | RPPH1           | 3,286407   |
| 81578     | COL21A1         | 2,676149   |
| 1471      | CST3            | 1,878789   |
| 84419     | C15orf48        | 3,371432   |
| 7697      | ZNF138          | -2,546403  |
| 6590      | SLPI            | 5,729274   |
| 5920      | RARRES3         | 8,98355    |
| 4600      | MX2             | 6,566646   |
| 100532737 | ATP6V1G2-DDX39B | -5,882481  |
| 4488      | MSX2            | -2,886209  |
| 2353      | FOS             | -4,695014  |
| 3433      | IFIT2           | 5,139303   |
| 104169670 | TMEM5-AS1       | -9,507795  |
| 101928600 | LOC101928600    | -8,660887  |
| 23600     | AMACR           | -3,268195  |
| 100506963 | TCEB3-AS1       | -3,728933  |
| 100505758 | PRMT5-AS1       | -10,313166 |
| 5269      | SERPINB6        | 2,110446   |
| 552900    | BOLA2           | -4,014941  |
| 3417      | IDH1            | 1,920174   |
| 1500      | CTNND1          | -3,989175  |
| 55502     | HES6            | -1,865207  |
| 125050    | RN7SK           | 3,093353   |
| 7846      | TUBA1A          | -1,710153  |
| 9235      | IL32            | 4,446247   |
| 23586     | DDX58           | 3,638675   |

|              |         |            |
|--------------|---------|------------|
| 3491         | CYR61   | -1,914295  |
| 54704        | PDP1    | 1,654288   |
| 101154753    | PANDAR  | -10,767357 |
| 10810        | WASF3   | -2,641364  |
| NM_001303027 | -       | -9,635265  |
| 54739        | XAF1    | 7,332695   |
| 7545         | ZIC1    | -6,62909   |
| 10239        | AP3S2   | -3,019433  |
| 79630        | C1orf54 | -2,290659  |
